# Supplementary material
Source: PubMed Central journal article supplement (PMC10030873)
Supplement: NIHMS1756114-supplement-1.pdf [file NIHMS1756114-supplement-1.pdf]

**Supplemental Table 1.** Family members' perspective on the interventions.

|                                                                  | <b>PRE</b>   | <b>%</b> | <b>POST</b>  | <b>%</b> |
|------------------------------------------------------------------|--------------|----------|--------------|----------|
|                                                                  | <b>N= 79</b> |          | <b>N= 80</b> |          |
| <b>Open visitation policy</b>                                    |              |          |              |          |
| <b>Do you know that visiting hours were changed to be open?</b>  |              |          |              |          |
| Yes                                                              | -            | -        | 34           | 60.7     |
| No                                                               | -            | -        | 22           | 39.2     |
| NA                                                               | -            | -        | 17           | -        |
| <b>I like that visiting hours are open in the ICU</b>            |              |          |              |          |
| Strongly agree                                                   | -            | -        | 56           | 76.7     |
| Somewhat agree                                                   | -            | -        | 9            | 12.3     |
| Neutral                                                          | -            | -        | 6            | 8.2      |
| Somewhat disagree                                                | -            | -        | 0            | 0        |
| Strongly disagree                                                | -            | -        | 2            | 2.7      |
| NA                                                               | -            | -        | 7            | -        |
| <b>It is helpful that there is open visitation in the ICU</b>    |              |          |              |          |
| Strongly agree                                                   | -            | -        | 53           | 72.6     |
| Somewhat agree                                                   | -            | -        | 11           | 15.06    |
| Neutral                                                          | -            | -        | 7            | 9.5      |
| Somewhat disagree                                                | -            | -        | 0            | 0        |
| Strongly disagree                                                | -            | -        | 2            | 2.7      |
| NA                                                               | -            | -        | 7            | -        |
| <b>Two-way communication boards</b>                              |              |          |              |          |
| <b>Do you know that a daily goal board is used in the ICU?</b>   |              |          |              |          |
| Yes                                                              | -            | -        | 55           | 77.4     |
| No                                                               | -            | -        | 16           | 22.5     |
| NA                                                               | -            | -        | 9            | -        |
| <b>I like that there is a daily goal board in the ICU</b>        |              |          |              |          |
| Strongly agree                                                   | -            | -        | 47           | 65.2     |
| Somewhat agree                                                   | -            | -        | 12           | 16.6     |
| Neutral                                                          | -            | -        | 11           | 15.2     |
| Somewhat disagree                                                | -            | -        | 0            | 0        |
| Strongly disagree                                                | -            | -        | 2            | 2.7      |
| NA                                                               | -            | -        | 8            | -        |
| <b>It is helpful that there is a daily goal board in the ICU</b> |              |          |              |          |
| Strongly agree                                                   | -            | -        | 44           | 61.1     |
| Somewhat agree                                                   | -            | -        | 15           | 20.8     |
| Somewhat disagree                                                | -            | -        | 1            | 1.3      |
| Neutral                                                          | -            | -        | 10           | 13.8     |
| Somewhat disagree                                                | -            | -        | 1            | 1.3      |
| Strongly disagree                                                | -            | -        | 2            | 2.7      |
| NA                                                               | -            | -        | 8            | -        |
| <b>Waiting room experience</b>                                   |              |          |              |          |
| <b>ICU waiting room satisfaction</b>                             |              |          |              |          |
| Excellent                                                        | 25           | 31.6     | 34           | 42.5     |
| Very good                                                        | 28           | 35.4     | 26           | 32.5     |
| Good                                                             | 16           | 20.3     | 13           | 16.3     |
| Fair                                                             | 8            | 10.1     | 6            | 7.5      |
| Poor                                                             | 2            | 2.5      | 1            | 1.3      |
| <b>Comfortable sleeping space for family in room</b>             |              |          |              |          |
| Very well                                                        | 14           | 26.9     | 24           | 35.8     |
| Okay                                                             | 20           | 38.5     | 32           | 47.8     |

|                                              |    |      |    |      |
|----------------------------------------------|----|------|----|------|
| Not at all                                   | 18 | 34.6 | 11 | 16.4 |
| N/A                                          | 27 | -    | 13 | -    |
| <b>Access to kitchen facilities</b>          |    |      |    |      |
| Very well                                    | 12 | 20.0 | 31 | 50.0 |
| Okay                                         | 17 | 28.3 | 24 | 38.7 |
| Not at all                                   | 31 | 51.7 | 7  | 11.3 |
| N/A                                          | 19 | -    | 18 | -    |
| <b>Access to nutritious snacks</b>           |    |      |    |      |
| Very well                                    | 12 | 23.5 | 30 | 47.6 |
| Okay                                         | 18 | 35.3 | 25 | 39.7 |
| Not at all                                   | 21 | 41.2 | 8  | 12.7 |
| N/A                                          | 28 | -    | 15 | -    |
| <b>Access to laundry facilities</b>          |    |      |    |      |
| Very well                                    | 18 | 32.7 | 32 | 51.6 |
| Okay                                         | 20 | 36.4 | 20 | 32.3 |
| Not at all                                   | 17 | 30.9 | 10 | 16.1 |
| N/A                                          | 24 | -    | 18 | -    |
| <b>Access to prayer and reflection space</b> |    |      |    |      |
| Very well                                    | 35 | 62.5 | 52 | 73.2 |
| Okay                                         | 16 | 28.6 | 18 | 25.4 |
| Not at all                                   | 5  | 8.9  | 1  | 1.4  |
| N/A                                          | 23 | -    | 9  | -    |

ICU: Intensive Care Unit. N/A: not available. The N/A responses were excluded from the frequencies calculations.
